1 **Title Page**

2 **Title**

3 Liver x receptor alpha drives chemoresistance in response to side-chain  
4 hydroxycholesterols in triple negative breast cancer

5 **Authors and Affiliations**

6 Samantha A Hutchinson<sup>1,2,#</sup>, Alex Websdale<sup>1,#</sup>, Giorgia Cioccoloni<sup>1</sup>, Hanne Røberg-Larsen<sup>3</sup>, Priscilia  
7 Lianto<sup>1</sup>, Baek Kim<sup>4</sup>, Ailsa Rose<sup>5</sup>, Chrysa Soteriou<sup>1</sup>, Laura M Wastall<sup>4</sup>, Bethany J Williams<sup>4</sup>, Madeline  
8 A Henn<sup>6</sup>, Joy J Chen<sup>6</sup>, Liqian Ma<sup>6</sup>, J Bernadette Moore<sup>1</sup>, Erik Nelson<sup>6,7,8,9,10</sup>, Thomas A Hughes<sup>5,11,\*</sup>  
9 and James L Thorne<sup>1,11,\*</sup>.

10 <sup>1</sup>School of Food Science and Nutrition, University of Leeds, Leeds, LS2 9JT, UK

11 <sup>2</sup>Institute for Cancer Research, London

12 <sup>3</sup>Department of Chemistry, University of Oslo, Oslo, Norway

13 <sup>4</sup>Leeds Teaching Hospitals NHS Trust, LS9 7TF, UK

14 <sup>5</sup>School of Medicine, University of Leeds, Leeds, LS9 7TF, UK

15 <sup>6</sup>Department of Molecular and Integrative Physiology, University of Illinois at Urbana Champaign,  
16 Urbana, Illinois, USA

17 <sup>7</sup>Cancer Center at Illinois, University of Illinois at Urbana Champaign, Urbana, Illinois, USA

18 <sup>8</sup>Division of Nutritional Sciences, University of Illinois at Urbana Champaign, Urbana, Illinois, USA

19 <sup>9</sup>University of Illinois Cancer Center, University of Illinois at Chicago, Chicago, Illinois, USA

20 <sup>10</sup>Carl R. Woese Institute for Genomic Biology, Anticancer Discovery from Pets to People Theme,  
21 University of Illinois at Urbana Champaign, Urbana, Illinois, USA

22 <sup>11</sup>Leeds Breast Cancer Research Group, Faculty of Medicine and Health, University of Leeds, Leeds,  
23 LS9 7TF, UK

24 <sup>#</sup>these authors contributed equally to the work in the manuscript

25 <sup>\*</sup>corresponding authors

1 **Running Title**

2 scOHC drive Pgp mediated chemotherapy resistance in TNBC

3 **Keywords**

4 chemotherapy, cholesterol, nutrition, side-chain hydroxycholesterol, breast cancer, LXR,

5 survivorship, triple negative breast cancer

6 **Conflict of Interest**

7 The authors declare there is no conflict of interest.

8 **Additional Information**

9 **Financial Support**

10 GC was supported by a grant funding from Breast Cancer Action (3T57/9R17-02). The human  
11 metabolite data collection and analysis, immunohistochemistry, and antibody validation  
12 performed by AW was supported by a grant from Breast Cancer UK (PO-180309) and by the  
13 University of Leeds School of Food Science and Nutrition. The British Endocrine Society provided  
14 an equipment award (NOV2016) allowing the development of the high throughput fluorescence  
15 efflux assay. SAH, CS, and PL were supported with Leeds Doctoral Scholarships and School of Food  
16 Science and Nutrition consumables support. ERN was supported by the National Cancer Institute  
17 of the National Institutes of Health (R01CA234025).

18 **Corresponding Author Details**

19 Dr James L Thorne; School of Food Science and Nutrition, University of Leeds, Leeds, LS2 9JT, UK;  
20 0044 113 3430684; [j.l.thorne@leeds.ac.uk](mailto:j.l.thorne@leeds.ac.uk) and, Dr Thomas A Hughes; School of Medicine,  
21 University of Leeds, Leeds, LS9 7TF, UK; 0044 113 3431984; [t.hughes@leeds.ac.uk](mailto:t.hughes@leeds.ac.uk)

22 **Other Details**

23 Abstract word count = 175; Manuscript word count w/o figure legends = 4698; Number of figures  
24 = 5; Number of supplementary figures = 13; Number of supplementary Tables = 1.

25

26

## 1 **Abstract**

2 Triple negative breast cancer (TNBC) is challenging to treat successfully because targeted  
3 therapies do not exist. Instead, systemic therapy is typically restricted to cytotoxic chemotherapy,  
4 which fails more often in patients with elevated circulating cholesterol. Liver x receptors are  
5 ligand-dependent transcription factors that are homeostatic regulators of cholesterol, and are  
6 linked to regulation of broad-affinity xenobiotic transporter activity in non-tumor tissues. We  
7 show that LXR ligands confer chemotherapy resistance in TNBC cell lines and xenografts, and that  
8 LXRA is necessary and sufficient to mediate this resistance. Furthermore, in TNBC patients  
9 who had cancer recurrences, LXRA and ligands were independent markers of poor prognosis  
10 and correlated with P-glycoprotein expression. However, in patients who survived their disease,  
11 LXRA signaling and P-glycoprotein were decoupled. These data reveal a novel chemotherapy  
12 resistance mechanism in this poor prognosis subtype of breast cancer. We conclude that systemic  
13 chemotherapy failure in some TNBC patients is caused by co-opting the LXRA:P-glycoprotein  
14 axis, a pathway highly targetable by therapies that are already used for prevention and treatment  
15 of other diseases.

16

17

18

19

20

21

22

23

24

25

26

## 1 Introduction

2 Breast cancer (BCa) prognosis depends on tumour and host parameters. Breast tumors that don't  
3 express the estrogen (ER), progesterone (PR), and Her2 receptors (ER-/PR-/Her2-), termed triple  
4 negative (TNBC), are challenging to treat successfully because therapies such as Tamoxifen and  
5 Herceptin that target ER and Her2 signaling respectively, are not effective. Typically, TNBC  
6 patients undergo surgical resection of primary tumor and lymph nodes, radiotherapy, and  
7 systemic cytotoxic chemotherapy. Chemotherapy can be given either before (neoadjuvant [NACT])  
8 or after (adjuvant [ACT]) surgery.

9 NACT is increasingly common to downstage the tumor to allow breast conserving surgery to be  
10 performed (Bagegni *et al*, 2019). A clinically measurable surrogate marker of likely outcome  
11 following NACT is pathological complete response (pCR) to treatment (Xia *et al*, 2020). If pCR is  
12 observed after NACT then prognosis is generally very good and invasive surgery is minimized. If  
13 pCR is not observed then treatment and can be adapted, but prognosis is worse and patients are  
14 likely to have been better placed on alternative treatments, such as long term adjuvant  
15 chemotherapy after surgical resection (Xia *et al.*, 2020). If TNBC patients are going to relapse with  
16 their disease, they typically do so within 2-3 years (Liedtke *et al*, 2008), highlighting a substantial  
17 subset of patients in whom systemic therapy has failed and who now have few remaining  
18 treatment options. Maximizing response to chemotherapy is a critical clinical need, yet the  
19 mechanisms responsible for resistance remain poorly understood (Eccles *et al*, 2013).

20 Circulating cholesterol levels appear to be inversely linked to survival of BCa patients, and are  
21 extensively modifiable by diet, lifestyle, and pharmacological interventions. Survival is worse for  
22 BCa patients who present with high LDL-cholesterol (dos Santos *et al*, 2014), but is improved with  
23 dietary (Brennan *et al*, 2017; Chlebowski *et al*, 2006; Jiang *et al*, 2019) or pharmaceutical (Liu *et al*,  
24 2017b) regimens that are associated with normalized LDL-C. A clinical trial that promoted dietary  
25 methods to reduce LDL-cholesterol was found to reduce breast cancer recurrence rates (Toledo *et al*,  
26 2015). Robust mechanistic evidence explaining these links remains sparse, thus the guidance  
27 that can be offered to different patient groups with respect to the potential benefits of reducing  
28 LDL-cholesterol remains limited (De Cicco *et al*, 2019). Cholesterol is the precursor for an array of  
29 compounds including hormones, seco-steroids, and bile acids. During the synthesis of these  
30 compounds, a diverse array of oxysterol intermediates are produced that are potent signaling  
31 molecules in their own right. Hydroxylation of the cholesterol side chain produces side-chain  
32 hydroxycholesterols (scOHC), such as 24-hydroxycholesterol (24OHC), 26-hydroxycholesterol  
33 (26OHC/27OHC), epoxycholesterols (e.g. 24,25-epoxycholesterol), and oxysterol conjugation can  
34 produce a wider variety of signaling molecules such as dendrogenin A. Oxysterols are continually  
35 detected by the liver x receptor alpha (LXR $\alpha$ ) and liver x receptor beta (LXR $\beta$ ) transcription factors

1 (Janowski *et al*, 1996), allowing for homeostatic control of end product synthesis and  
2 simultaneously inhibiting potentially harmful build-up of oxysterol intermediates (Clare *et al*,  
3 1995) or of cholesterol itself (Tabas, 2002). Selective modulation of LXR $\alpha$  and LXR $\beta$  by oxysterols  
4 leads to divergent effects in cancer pathophysiology. For example, the oxysterol-histamine  
5 conjugate dendrogenin A preferentially activates LXR $\beta$ , induces lethal autophagy (Poirot &  
6 Silvente-Poirot, 2018) and differentiation of breast cancer cells (Bauriaud-Mallet *et al*, 2019).  
7 Contrary to this, in TNBC scOHCs promote metastatic colonization (Baek *et al*, 2017) and epithelial  
8 mesenchymal transition, and in ER-positive breast cancers, scOHCs both reduce endocrine  
9 therapy efficacy (Nguyen *et al*, 2015) and are circulating biomarkers of recurrence (Dalenc *et al*,  
10 2017).

11 Interestingly, there is evidence that LXR $\alpha$  and scOHCs may also play a role in chemotherapy  
12 resistance. LXR $\alpha$  maintains integrity of the blood brain barrier (Wouters *et al*, 2019) via  
13 upregulation of the multi-drug resistance pump, P-glycoprotein, in response to oxysterols (Saint-  
14 Pol *et al*, 2013) and synthetic LXR ligands (ElAli & Hermann, 2012). The ATP-Binding Cassette B1  
15 (ABCB1)/P-glycoprotein (Pgp) is a highly promiscuous xenobiotic efflux transporter with substrate  
16 diversity that includes cholesterol (Garrigues *et al*, 2002) and an array of chemotherapy agents  
17 typically given to TNBC patients. LXR and Pgp therefore potentially link oxysterol signaling to  
18 chemotherapy efficacy. We previously demonstrated that ER-negative breast cancer was highly  
19 responsive to LXR $\alpha$  signaling compared to other breast cancer types (Hutchinson *et al*, 2019)  
20 suggesting retention of the scOHC:LXR axis provided a survival advantage to TNBC tumors that  
21 persisted despite the anti-proliferative actions LXR confers. Here, we have explored the  
22 hypothesis that failure of systemic chemotherapy could be attributed to a cholesterol rich tumour  
23 environment, where aberrant activation of the scOHC:LXR:Pgp signalling axis is co-opted to confer  
24 resistance to common chemotherapy drugs.

## 25 **Materials and Methods**

### 26 **Cell culture and cell lines**

27 Cell lines were originally obtained from ATCC. All cells were routinely maintained at 37°C with 5%  
28 CO<sub>2</sub> in Dulbecco's Modified Eagle Medium (DMEM, Thermo Fisher, Cat: 31966047) supplemented  
29 with 10% FCS (Thermo Fisher, UK, Cat: 11560636). Cell lines were confirmed mycoplasma free at  
30 6-monthly intervals, and cell line identities were authenticated at the start of the project.

## 1     **Drugs and reagents**

2     All stocks were stored at -20°C. scOHCs were from Avanti (Alabama, US) and stored as 10 mM  
3     stocks in nitrogen flushed ethanol: 24OHC (#700071), 25OHC (#700019), 26OHC (#700021).  
4     Epirubicin (Cayman, UK Cat:12091) was stored at 10 mM in nuclease free water and protected  
5     from light. GSK2033 (ToCris, Abindon, UK – #5694) at 20 mM diluted in ETOH. ABC inhibitors: MK-  
6     571 (Cambridge Bioscience – Cat: 10029-1mg-CAY) and KO143 (Sigma – Cat: K2144-1mg) were  
7     diluted in DMSO, while Verapamil (Insight Biotechnology – Cat: sc-3590) was diluted in NFW; all at  
8     10 mM. TaqMan assays (Thermo Fisher, Paisley, #4331182): LXR $\alpha$  [Hs00172885\_m1] LXR $\beta$   
9     [Hs01027215\_g1], Pgp [Hs00184500\_m1], ABCA1 [Hs01059137\_m1], HPRT1 [Hs02800695\_m1].  
10    Origine trisilencer complexes (Maryland, US): LXR $\alpha$  #SR322981, LXR $\beta$  #SR305039). Antibodies: Pgp  
11    (Santa Cruz Biotech, CA, US - #sc73354), CYP27A1 (Abcam, Cambridge, UK - #ab126785), CYP46A1  
12    (Abcam, Cambridge, UK - #ab198889), CH25H (Bioss, MA, US - #bs6480R), LXR $\alpha$  (R&D System,  
13    Minneapolis, US - #PP-PPZ0412-00), LXR $\beta$  (Active Motif, Carlsbad, US - #61177). Antibody  
14    validation is described in detail in Supplementary Information.

## 15    **Analysis of gene expression**

16    Analysis of gene expression was performed as described previously (Hutchinson *et al.*, 2019).  
17    Briefly, mRNA was extracted using Reliaprep Minipreps for cell cultures (Promega, UK, #Z6012)  
18    and RNA Tissue Miniprep System (Promega, UK, #Z6112 for tumor samples. GoScript™ (Promega,  
19    UK, #A5003) was used for the cDNA synthesis. Taqman Fast Advanced Mastermix (Thermo Fisher,  
20    Paisley, #4444557) was mixed with Taqman assays and analysed in a 384 well QuantStudio Flex 7  
21    (Applied Biosystems Life Tech, Thermo Scientific) in 5 $\mu$ l reaction volumes. siRNA (30nM) were  
22    transfected with RNAiMAX (Thermo Fisher, #13778030) according to manufacturer's instructions  
23    with following adaption. Cells were incubated for 22 h with reagent/siRNA mixture and then  
24    media was exchanged. After a further 14 h RNA was extracted. All experiments were conducted in  
25    technical triplicate and are presented as mean  $\pm$  SEM of three or more independent replicates

## 26    **Cell viability assays**

27    MTT were performed as previously described (Hutchinson *et al.*, 2019). Briefly, cells were  
28    suspended to 1x10<sup>6</sup> cells/mL, 250  $\mu$ L/well of cell suspension was plated into 6-well plates and  
29    topped up to 2 mL with DMEM-10%. Cells were incubated overnight and then treated with  
30    GW3965, GSK2033, scOHC or vehicle control (VC) (ETOH/DMSO/N<sup>2</sup>F ETOH) for 24 h. Epirubicin (25  
31    nM) or VC (nuclease free water) was added for a further 24 h. Cells were then counted and 500  
32    cells per treatment were plated in triplicate in 6 well plates (Nunc, Thermo Fisher, UK, Cat:  
33    10119831) and incubated for 12 days. Colonies were washed with PBS and stained with a 0.1 %

1 crystal violet staining solution was this in 50 % methanol, 30 % ethanol and 20 % ddH<sub>2</sub>O (Sigma,  
2 UK, Cat: V5265-250 ML). Colonies were left to air dry overnight then counted. All experiments  
3 were conducted in technical triplicate and are presented as mean ± SEM of three or more  
4 independent replicates

5 Colony forming assays (CFA) were performed as previously described (Thorne *et al*, 2018). Briefly,  
6  $2 \times 10^4$  cells were seeded in 96 well plates and incubated overnight. For the combination  
7 treatment with EPI, cells were pre-treated with LXR synthetic ligands (0.1, 0.25, or 1 μM), or  
8 scOHC (1, 2.5, or 10 μM) for 24 h. After 24 h treatment, EPI was added and incubated for the next  
9 48 h. Cells were washed with 100 μL PBS/well. 90 μL phenol red free DMEM supplemented with  
10 10% FBS was added to each well and followed with the addition of 10 μL of diluted MTT reagent  
11 (Sigma-Aldrich, UK, Cat: M2128; final concentration 0.5 mg/mL) to each well. After 4 h incubation  
12 at 37°C, media was carefully removed and replaced with 100 μL of DMSO/well. The absorbance  
13 was read using a CLARIOstar plate reader (BMG LABTECH, Germany) at 540 nm. All experiments  
14 were conducted with six technical replicates and are presented as mean ± SEM of three or more  
15 independent replicates.

## 16 **Chemotherapy efflux Assay**

17 Cells were plated (50,000 cells/well) in clear bottom black walled tissue culture 96 well plates  
18 (Greiner Bio-One, UK, Cat: 655986) and pre-treated with either VC (ETOH) or LXR ligands  
19 (GSK2033, GW3965 at 1 μM, 24OHC, 26OHC, 10 μM) for 16 h before a high dose of chemotherapy  
20 agent (50 μM epirubicin) for 1 h. Cells were gently washed with PBS twice taking care not to  
21 disrupt/detach cells and fresh PBS (100 μL) was placed in the wells and fluorescence was  
22 measured using a TECAN plate reader at 485 nm excitation and 590 nm emission. Cells were then  
23 placed in the incubator with fresh growth media in the wells and wash steps and fluorescence  
24 read at 15 min intervals for 2 h. Data for treated wells were normalised to vehicle controls. For  
25 pump inhibitor treatment, drugs were administered to the cells 30 min before epirubicin loading  
26 (verapamil - 20 μM, MK571 – 50 μM, and KO143 – 15 μM). All experiments were conducted in  
27 technical triplicate and are presented as mean ± SEM of three or more independent replicates.

## 28 **In vivo model**

29 All protocols involving mice were approved by the Illinois Institutional Animal Care and Use  
30 Committee at the University of Illinois. Mouse 4T1 BCa cells were maintained in DMEM  
31 supplemented with 10 % calf serum.  $1 \times 10^6$  cells in a 1:1 ratio of PBS:matrigel were grafted  
32 orthotopic into the axial mammary fat pad of BALB/c mice. Mice were split into 4 groups (ten mice  
33 per group) of placebo, GW3965, epirubicin, or GW3965 and epirubicin combined. Daily treatment

1 with GW3965 (30mg/kg) or placebo started one day post-graft. Treatment with epirubicin started  
2 two days post-graft and was administered every other day at 2.5mg/kg. Subsequent tumor growth  
3 was determined by direct caliper measurement. At the end of the experiment, mice were  
4 humanely euthanized, and tumors were dissected and weighed. Quantification of mRNA was  
5 carried out as described previously (Shahoei *et al*, 2019). Relative expression was determined via  
6 the 2- $\Delta\Delta$ CT method and normalized to housekeeping gene (TBP).

## 7 **Human samples: Ethical approval, collection, and processing**

8 37 fresh/frozen tumour samples for LC-MS/MS and gene expression analysis were obtained with  
9 ethical approval from the from the Leeds Breast Research Tissue Bank (15/HY/0025). Selection  
10 criteria were all available ER-negative tumours with >3yr follow-up with fresh-frozen tumour  
11 material available. Supplementary Table 1 summarizes the clinic-pathological features of the  
12 ‘fresh/frozen’ cohort. For the tissue micro-array (TMA) 148 tumour samples were obtained with  
13 ethical approval from Leeds (East) REC (06/Q1206/180, 09/H1306/108). The patient cohort  
14 consisted of triple negative/ basal tumours as determined through immunohistochemistry.  
15 Further selection criteria were that selected tumours had not undergone neoadjuvant therapy,  
16 contained sufficient tumour stroma, had low levels of inflammatory cells or necrotic material, and  
17 whether normal tissue was available from archival resection blocks (n=148). Suitable tumour areas  
18 were identified through haematoxylin/eosin stain and 0.6mm cores of tumour tissue removed in  
19 triplicate and deposited into recipient wax block. Supplementary Table 2 summarizes the clinic-  
20 pathological features of the TMA cohort.

## 21 **Statistics**

22 Analysis of colony forming assays was performed using paired t-tests for comparisons between  
23 epirubicin treated cells with and without pre-treatment with LXR ligands, or one-way ANOVA after  
24 correction for multiple testing when comparing all treatments at once. Analysis of gene and  
25 protein correlations were assessed using Spearman’s correlation with linear regression.  
26 Significance in gene expression analyses of genes implicated in chemotherapy resistance pre  
27 and post gene silencing and inhibitor loading was assessed using 2-way ANOVA. The half-life of  
28 intra-cellular epirubicin signal was determined using dissociation one phase exponential decay and  
29 the expression of Pgp in patient tumours that had suffered an event compared with those who  
30 had not was assessed using Mann-Whitney U tests. Patient survival was assessed using log rank  
31 tests and *in vivo* mouse experiments were assessed using 1-way ANOVA and corrected for  
32 multiple comparisons.



## 1 **Results**

### 2 **LXR ligands influence epirubicin response in TNBC cells in vitro**

3 To establish if the scOHC-LXR axis influences TNBC chemotherapy response, *in vitro* assays were  
4 used to test how combinations of epirubicin and LXR ligands altered tumor cell survival and  
5 growth. MTT assays were used as a readout of cellular health. LXR agonist treatment generally  
6 impaired epirubicin cytotoxicity, while antagonism of LXR enhanced efficacy. Apply the LXR  
7 synthetic agonist GW3965 increased the concentration of epirubicin needed to induce cell death  
8 ( $p < 0.0001$  for 0.1 $\mu$ M, 0.25 $\mu$ M and 1 $\mu$ M in MDA.MB.468 and  $p < 0.01$  for all concentrations in  
9 MDA.MB.231), as did the endogenous agonists 24OHC ( $p < 0.05$ ) for all concentrations in both cell  
10 lines, and 10 $\mu$ M 26OHC (also known as 27-hydroxycholesterol, the product of CYP27A1;  $p < 0.05$   
11 for both cell lines), (Fig 1A). For all concentrations of the LXR antagonist GSK2033 tested (Fig 1B) in  
12 MDA.MB.468 cells there was a significant increase in epirubicin effect ( $p < 0.0001$ ). In MDA.MB.231  
13 cells only 250nM was effective ( $p < 0.05$ ). Colony forming assays (CFA) were then conducted with  
14 cells pre-treated with LXR ligands or vehicle control, before being exposed to epirubicin. As  
15 expected, epirubicin treatment alone (25 nM for 24 h) resulted in a significant attenuation  
16 ( $p < 0.001$ ) of between 40-70 % of the cells' ability to form colonies in the following days (note y  
17 axis for epirubicin in Fig 1C). When LXR agonists GW3965, 24OHC, or 26OHC were combined with  
18 epirubicin treatment (Fig 1C) we observed significant rescue of colony formation compared to the  
19 epirubicin alone ( $p < 0.01$  for all agonists in both MDA.MB.231 and MDA.MB.468). When the  
20 synthetic LXR antagonist GSK2033 was used however (Fig 1D) the reverse was observed and the  
21 efficacy of epirubicin was enhanced ( $p < 0.05$ ). All concentrations of LXR ligands tested could  
22 transactivate LXR (Hutchinson *et al.*, 2019). Low doses that had no effect on proliferation (SF1A) or  
23 colony formation (SF1B), as well as higher doses that were antiproliferative in MTT were evaluated  
24 to avoid confounding chemoresistance with anti-proliferative effects. From these data we  
25 concluded that synthetic and endogenous LXR ligands conferred resistance to epirubicin.

### 26 **LXR $\alpha$ is linked to Pgp expression and function in TNBC patients and in** 27 **vitro**

28 The chemotherapy efflux pump Pgp was a strong candidate as the mediator of this LXR ligand  
29 induced resistance to epirubicin, as it has previously been reported to be modulated by oxysterols  
30 in the blood brain barrier (Saint-Pol *et al.*, 2013). To establish if Pgp is potentially regulated by  
31 LXR $\alpha$  or LXR $\beta$ , and thus sensitive to cholesterol metabolic flux in the tumor, we mined publicly  
32 available transcriptomics datasets from TNBC tumours to determine correlation of mRNA  
33 expression, and binding of the LXRs to the Pgp promoter.

1 Expression of LXR $\alpha$  mRNA was weakly, although significantly, correlated with Pgp (Fig 2A) in both  
2 METABRIC (n=313; p=0.0024; R=0.17) and TCGA datasets (n=95; p=0.0076; R=0.27). No  
3 correlations between LXR $\beta$  and Pgp were observed (p>0.05). Other drug efflux pumps (MRP1 and  
4 BCRP) were not correlated with LXR $\alpha$  in either dataset (SF2; p>0.05). We next investigated if LXR $\alpha$   
5 or LXR $\beta$  could directly bind the Pgp promoter using mouse macrophage and liver tissue datasets,  
6 available in the cistrome.org ChIP-Seq repository. LXR $\alpha$ , but not LXR $\beta$ , accumulated in the  
7 promoter region of Pgp in response to LXR agonist (SF3). As a positive control, we also confirmed  
8 that both LXR $\alpha$  and LXR $\beta$  accumulated in the promoters of known LXR target genes ABCA1 and  
9 APOE (SF3). These data are consistent with the hypothesis that LXR $\alpha$ , but not LXR $\beta$ , is able to bind  
10 the Pgp promoter region. Furthermore, expression of LXR $\alpha$ , but not LXR $\beta$ , is positively correlated  
11 with Pgp expression in the tumours of TNBC patients in separate publicly available datasets.

12 To ascertain if Pgp was regulatable by LXR ligands in TNBC cells, we treated MDA.MB.468 and  
13 MDA.MB.231 cells with a range of LXR ligands and found significant up- and down-regulation of  
14 Pgp in response to agonists or antagonists respectively at two different time-points (Fig 2B). To  
15 test which LXR isoform was primarily responsible for Pgp induction, siRNA was used to knock  
16 down LXR $\alpha$  and LXR $\beta$  separately. siLXR $\alpha$  significantly diminished Pgp expression (Fig 2C; p<0.01),  
17 demonstrating the LXR $\alpha$  positively regulates Pgp, and also halted the agonist GW3965's ability to  
18 protect cells from epirubicin in CFA (Fig 2D; p>0.05), demonstrating the functional impact of  
19 LXR $\alpha$ 's control of Pgp. Knock-down of LXR $\beta$  did not reduce Pgp expression. siLXR $\alpha$  and siLXR $\beta$   
20 knockdown efficiency was confirmed at protein (SF4A) and mRNA levels (SF4B), as was loss of  
21 expression of canonical target gene expression (SF4B). Knock down of either LXR isoform had no  
22 effect on expression of MRP1 (SF4C; p<0.05) or BCRP efflux pumps (SF4D; p<0.05).

23 After establishing Pgp expression was at least in part dependent on the scOHC-LXR $\alpha$  axis, and that  
24 this signaling pathway protected TNBC cells from chemotherapy, we hypothesized that Pgp's drug  
25 efflux function was crucial. We developed a novel chemotherapy efflux assay allowing time-  
26 resolved monitoring of intracellular epirubicin concentration in a high throughput system by  
27 exploiting epirubicin's natural fluorescence. After pre-treating MDA.MB.468 or MDA.MB.231 cells  
28 with vehicle control (VC; ethanol), LXR agonist (GW3965, 24OHC, or 26OHC) or antagonist  
29 (GSK2033) cells were then 'loaded' with epirubicin and intra-cellular epirubicin measured at 15  
30 min intervals as the epirubicin was pumped out. The half-life ( $t_{1/2}$ ) of epirubicin signal in vehicle  
31 treated control cells was 13.05 min for MDA.MB.468 cells and 16 min for MDA.MB.231 (Fig 2E)  
32 and all pre-treatments were compared back to this vehicle/epirubicin condition with one-phase  
33 decay non-linear regression model. GW3965 pre-treatment led to a significant reduction in  
34 epirubicin retention time to  $t_{1/2} = 10.98$  min (p=0.00899) and  $t_{1/2} = 12.28$  min (p<0.0001) in  
35 MDA.MB.468 and MDA.MB.231 cells respectively (note shift of Epi curve [open circles with solid

1 line] to left with addition of GW3065 [open squares with dotted line]). scOHC pre-treatment also  
2 significantly ( $p < 0.0001$  for all) shifted curves to the left, again indicating decreased epirubicin  
3 retention time (468 cells: 24OHC  $t_{1/2} = 8.27$  min, 26OHC  $t_{1/2} = 9.62$  min; 231 cells: 24OHC  $t_{1/2} = 12.28$   
4 min, 26OHC  $t_{1/2} = 12.38$  min). This enhanced efflux of epirubicin was reversible by the Pgp specific  
5 inhibitor verapamil (V20) (note shift of curve to the right with V20 as denoted by closed squares),  
6 demonstrating the dependence on Pgp function. In contrast, inhibiting LXR activity with the  
7 synthetic antagonist GSK2033 led to significantly increased retention of epirubicin (468 cells:  $t_{1/2} =$   
8 20.19 min; 231 cells: 231 cells  $t_{1/2} = 25.86$  min  $p = 0.0004$ ), and this was not reversed or enhanced by  
9 verapamil ( $p > 0.05$ ). Overall intra-cellular epirubicin accumulation was also lower in LXR agonist  
10 treated cells (SF5A). Experiments with selective inhibitors demonstrated that Pgp but not other  
11 drug efflux pumps (MRP1, BCRP) was necessary and sufficient for LXR mediated epirubicin efflux in  
12 control experiments (SF5B-C).

### 13 **LXR activation confers chemoresistance and enhances Pgp expression** 14 **in vivo**

15 To corroborate *in vivo* these chemoprotective effects of the scOHC-LXR axis, a preclinical model  
16 using TNBC syngeneic 4T1 cells grafted in mammary fat pads of Balb/c mice was evaluated. Mice  
17 in four groups were treated with either vehicle control, GW3965, epirubicin, or GW3965 and  
18 epirubicin combined. As expected, epirubicin reduced tumour growth (Fig 3A) and final size (Fig  
19 3B), as did GW3965. The tumors of mice in the combination group grew significantly more quickly  
20 ( $p < 0.0001$ ) and were significantly larger ( $p < 0.0001$ ) than the epirubicin alone group. Analysis of  
21 resected tumors indicated significantly increased expression of both canonical *Abca1* ( $p < 0.001$ )  
22 and *Abcb1b* (the mouse gene for Pgp) ( $p < 0.0001$ ) in GW3965 treated animals compared to  
23 controls (Fig 3B), demonstrating that the LXR agonist had effectively activated relevant target  
24 genes within the tumour tissue. Mice in all groups gained weight at a similar rate through the  
25 experiment ( $p > 0.05$ ) indicating mouse health was similar between groups over the experimental  
26 period (SF6A). Other drug efflux pumps were not found to be induced by GW3965 in this model  
27 (SF6B). We concluded that activation of LXR *in vivo* induced expression of Pgp and confers  
28 chemoresistance as observed *in vitro*.

### 29 **LXR and its ligand regulators are correlated with Pgp and are prognostic** 30 **indicators in ER-negative BCa patients**

31 To investigate if LXR $\alpha$  protein was associated with Pgp expression in ER-negative breast cancer  
32 patients, ABCA1 mRNA, Pgp mRNA, LXR $\alpha$  protein expression were measured in a cohort of ER-  
33 negative tumor samples from the Leeds Breast Research Tissue Bank (LBRTB cohort:  $n = 47$ ; patient  
34 characteristics reported in Supplementary Table 1; representative immunoblots shown in SF7).

1 LXR $\alpha$  protein was positively correlated with mRNA expression of Pgp (Fig 4A;  $p=0.0046$ ;  $r=0.43$ ),  
2 validating previous mRNA analyses from public datasets (Fig 2A). Kaplan-Meier survival analyses  
3 after the cohort was dichotomized into low and high expression groups for LXR $\alpha$  indicated that  
4 high LXR $\alpha$  (Fig 4B;  $p=0.0051$ ) were associated with significantly worse prognosis.

5 To explore if Pgp protein expression and patient prognosis were associated with synthesis of OHC,  
6 we undertook two analyses. First, a large-scale analysis of scOHC synthesizing enzyme expression  
7 in TNBC tumors in a microarray of formalin fixed tissue (TMA cohort:  $n=148$ ; patient  
8 characteristics reported in Supplementary Table 2). Pgp protein expression in TNBC epithelial cells  
9 was a strong indicator of shorter disease free survival (Fig 4C;  $p=0.004$ ), and expression was  
10 strongly and significantly positively correlated with protein expression CYP46A1 ( $p<0.0001$ ;  
11  $R^2=0.3$ ) and CH25H ( $p<0.0001$ ;  $R^2 = 0.57$ ), and weakly with CYP27A1 ( $p=0.004$ ;  $R^2=0.07$ ) (Fig 4D –  
12 left panels), enzymes that synthesize 24OHC, 25OHC, and 26OHC respectively.

13 Shorter disease-free survival was found in patients with high expression of CYP46A1 ( $p=0.005$ ) and  
14 CH25H ( $p=0.0072$ ), but not CYP27A1 ( $p>0.05$ ) (Fig 4D - right panels). Secondly, a smaller analysis  
15 was performed in the LBRTB cohort where fresh-frozen tissue was available thus allowing direct  
16 LC-MS/MS measurements of scOHC concentrations in matched tumour samples to protein lysates  
17 measured in Fig 4D. 24OHC (but not 25OHC or 26OHC) metabolite concentrations were  
18 significantly positively correlated with Pgp mRNA expression (Fig 4E – left panels); high  
19 concentration of all three metabolites (24OHC  $p=0.026$ ; 25OHC  $p=0.011$ ; 26OHC  $p=0.01$ ) were  
20 prognostic of shorter disease-free survival (Fig 4E – right panels). From these data we concluded  
21 that multiple components of the LXR signaling pathway were likely to converge on Pgp mediated  
22 drug resistance and contribute to shorter disease-free survival in TNBC patients.

### 23 **LXR $\alpha$ and its ligands are decoupled from Pgp in surviving TNBC** 24 **patients, but remain linked in patients who suffer relapse or die**

25 After establishing a mechanism linking the cholesterol metabolic sensor, LXR $\alpha$ , with  
26 chemotherapy resistance at the molecular level, and discovering a discernable effect on survival in  
27 cell lines, pre-clinical models and patients, we wanted to explore if measuring activity of the  
28 scOHC:LXR pathway could separate surviving patients from those who relapse or died from their  
29 disease. We split the LBRTB cohort (Supplementary Table 1) into a ‘no event’ group, i.e. those who  
30 did not have a recurrence during follow up (median follow up time = 96 months), and an ‘event’  
31 group, i.e. those who had either died from their disease or had relapsed (median time to event =  
32 20 months). Protein expression of LXR $\alpha$  ( $p=0.076$ ), and mRNA expression of ABCA1 ( $p=0.0121$ )  
33 and Pgp ( $p=0.0015$ ) were higher in the ‘event’ group (Fig 5A) indicating greater activity of the LXR  
34 signaling axis in the event group; interestingly, the concentrations of scOHC metabolites were not

1 significantly different between the event and no event groups (SF8). We also tested the  
2 correlations between expression of Pgp and its regulators LXR $\alpha$  and 24OHC in the cohort,  
3 separating patients who had an event from those who didn't; LXR $\alpha$  protein was only correlated  
4 with Pgp in the event group (Fig 5B; p=0.0012) and similarly, 24OHC was only correlated with Pgp  
5 in the event group (Fig 5C; p=0.01). We tested this relationship in the METABRIC cohort and found  
6 that LXR $\alpha$  only correlated with Pgp in patients who had died from their disease or who had  
7 relapsed (SF9; p=0.017).

## 8 Discussion

9 The purpose of this study was to evaluate the role of cholesterol side-chain hydroxylation  
10 products on chemotherapy resistance, specifically in TNBCs – the breast cancer subtype in which  
11 chemoresistance is most problematic. We demonstrated that LXR $\alpha$  activation is linked to  
12 chemotherapy resistance *in vitro* and *in vivo*, and to worse patient survival. We conclude that this  
13 is due, at least in part, to the chemotherapy efflux pump Pgp being a transcriptional target of the  
14 scOHC:LXR axis, thus linking cholesterol status with the innate ability of a triple negative tumor  
15 cells to evade chemotherapy. A major observation from our data was that patients stratified by  
16 survival status had divergent LXR signalling pathways; the tumours of the patients who died were  
17 enriched for scOHC synthesizing enzymes and the metabolite 24OHC, and there was a positive  
18 correlation between Pgp and individual components of the signaling axis. In patients who did not  
19 have recurrences, these signaling components were not correlated with Pgp, irrespective of which  
20 cohort we evaluated, indicating that actual decoupling of LXR from Pgp in these tumours was  
21 contributing to survival.

22 The role of drug efflux pumps such as Pgp, BCRP, and MRP1 in TNBC resistance have been  
23 described (Kim *et al*, 2013; Kim *et al*, 2015). Yet directly targeting these pumps has largely failed as  
24 a clinical strategy due to the essential roles that xenobiotic efflux pumps play in healthy tissue,  
25 from side effects from drug-drug interactions, and lack of specificity (Yang *et al*, 2018). The factors  
26 that determine whether pCR is achieved are important to elucidate because patients for whom  
27 only a partial pathological response with NACT is achieved typically do worse than those who elect  
28 for ACT (Xia *et al*, 2020). Cancer specific mechanisms of efflux pump regulation have been  
29 identified, but until now have largely been attributed to oncogenic signalling pathways converging  
30 on their transcriptional regulation (Das *et al*, 2013; Kim *et al*, 2015). The data reported here  
31 however indicate a new direction; we provide evidence of a direct link between the expression  
32 and function of Pgp, and metabolic flux of cholesterol, a nutrient that is modifiable by diet,  
33 lifestyle, and existing pharmacological approaches. In this context, the findings presented here  
34 lead to speculation that two clinical hypotheses are appropriate for further evaluation. Firstly,  
35 patients stratified based on LXR activity may be predicted to achieve different rates of pCR after

1 NACT, or survival after ACT. Secondly, a therapeutic adjunct that limits scOHC synthesis may  
2 improve pCR rates. Cholesterol lowering approaches are already in clinical practice for the  
3 management of cholesterol related diseases. Excitingly, these interventions could be tailored to  
4 the patient to offer an element of control to individuals who may otherwise seek lifestyle and  
5 dietary guidance from sources that have not been peer reviewed (Thorne *et al*, 2020). It of course  
6 remains to be determined if such strategies would be beneficial in improving survival rates via  
7 chemosensitization, but it is encouraging that extra-hepatic scOHC levels are modifiable by diet  
8 (Guillemot-Legris *et al*, 2016; Sozen *et al*, 2018) as well as circulating levels being highly responsive  
9 to statins (Dias *et al*, 2018). A meta-analysis of statin use in unstratified breast cancer patients has  
10 shown inhibition of cholesterol synthesis was associated with protection from relapse and death  
11 in the first 4 years post-diagnosis (Liu *et al*, 2017a), which interestingly, is the period of highest  
12 relapse risk for TNBC patients (Liedtke *et al.*, 2008).

13 LXR ligands are being explored in clinical trials as novel therapeutics, and as diagnostic and  
14 prognostic tools. Within these studies, important distinctions between activation of LXR $\alpha$  and  
15 LXR $\beta$  need consideration. The histamine conjugated oxysterol such as dendrogenin A,  
16 preferentially activates LXR $\beta$  and drives lethal autophagy (Poirot & Silvente-Poirot, 2018) and  
17 differentiation of breast cancer cells (Bauriaud-Mallet *et al.*, 2019), and synthetic the LXR $\beta$  agonist  
18 RGX-104 enhances cytotoxic T lymphocyte tumour destruction (Tavazoie *et al*, 2018). Dual  
19 LXR $\alpha$ /LXR $\beta$  ligands such as 26OHC convincingly slow tumour growth through the anti-proliferative  
20 activities of LXR, drive LXR dependent metastasis (Nelson *et al*, 2013), and substitute for estrogen  
21 to drive ER dependent breast cancer growth (Nelson *et al.*, 2013; Wu *et al*, 2013). Furthermore,  
22 circulating dual LXR oxysterol ligands may be prognostic and therapeutic indicators (Dalenc *et al.*,  
23 2017). Our results suggest efficacy of cytotoxic therapies may be reduced if LXR $\alpha$  is stimulated;  
24 caution should be applied in clinical application of dual LXR ligands or of LXR $\alpha$  agonists, as novel  
25 cancer therapeutics.

26 Mechanisms that lead to innate chemoresistance have previously been flagged as a critical  
27 research gap (Eccles *et al.*, 2013). LXR is a sensor and homeostatic regulator of nutritional status,  
28 so our data support the hypothesis that a cholesterol rich environment during tumor  
29 development may actually contribute to innate chemoresistance, thus addressing a critical  
30 research gap. Ligand dependent activation of LXR in many tissues is controlled by factors that can  
31 be influenced by the diet and existing pharmacological agents, making this pathway attractive for  
32 therapeutic targeting. Encouragingly, further clinical investigation where dietary advice or statins  
33 that acutely lower circulating or tissue scOHC levels could evaluate LXR modulation to improve  
34 pCR rates in this hard to cure subgroup of breast cancer patients. In conclusion, endogenous  
35 synthesis of LXR ligands and LXR $\alpha$  activity are prognostic indicators for TNBC patient survival and

1 should be explored prospectively in the clinical setting as functional and targetable prognostic  
2 indicators for response to chemotherapy.

3

#### 4 **Figure Legends**

5 **Figure 1: LXR ligands induce chemoresistance in triple negative breast cancer cell lines.** MTT assay of epirubicin dose  
6 response following pre-treatment of MDA.MB.468 and MDA.MB.231 cell lines with low, medium, and high doses  
7 of LXR agonists (A) or antagonist (B). Data shown are mean with SEM of 3 independent replicates each performed  
8 with 6 technical replicates. Statistical significance was determined using non-linear regression curve comparison  
9 against epirubicin (EPI) only curve. Colony Forming Assays measuring how the ability of MDA.MB.468 and  
10 MDA.MB.231 cell lines to generate colonies after epirubicin exposure is improved by pre-treating cells with LXR  
11 agonists (C) or antagonist (D). Three or 4 independent replicates were performed (as indicated), each independent  
12 replicate is the mean of 3 technical repeats. p-values were calculated using paired t-test.

13 **Figure 2: Pgp expression and function is linked to LXR activity.** Correlation analysis in TNBC tumors of *LXR $\alpha$*  or *LXR $\beta$*   
14 with *ABCA1* and *Pgp* gene expression obtained from obtained from METABRIC (n=313) and TCGA (n=95) datasets  
15 accessed via cBioportal (A). Statistical significance was assessed using Pearson's correlation test with linear  
16 regression. Pgp expression measured at indicated time points after ligand exposure (B) or siRNA knockdown of  
17 *LXR $\alpha$*  or *LXR $\beta$*  (C). B-C Symbols show independent replicates and bars show mean with SEM. Statistical analysis was  
18 performed using 2-way ANOVA and is representative of 3 independent replicates with SEM. Colony forming assay  
19 in MDA.MB.468 cells after loss of *LXR $\alpha$*  by siRNA showing GW3965 (GW) no longer protects cells from epirubicin  
20 in the absence of *LXR $\alpha$*  (D). MDA.MB.468 and MDA.MB.231 cells were pre-treated with LXR ligands or vehicle for 16  
21 h and Pgp inhibitor (verapamil 20  $\mu$ M [V20]) or vehicle for 30 min, before loading with epirubicin (50  $\mu$ M) for 1h.  
22 The half-life of the intra-cellular epirubicin signal was calculated using dissociation one phase exponential decay.  
23 NB: epirubicin curve data are replicated in each graph for visualization purposes. Data shown are mean with SEM  
24 of 3 or 4 independent replicates each made from six technical replicates. Significance was calculated using non-  
25 linear regression curve comparison against epirubicin (EPI) only curve.

26 **Figure 3: LXR activation drives Pgp expression and chemotherapy resistance in vivo.** 4T1 cells (TNBC) were grafted  
27 orthotopically into the axial mammary fat pad of BALB/C mice. Mice were treated with either placebo or the LXR  
28 ligand GW3965 (daily, 30 mg/kg) 24 h post-graft. Treatments with placebo or epirubicin (every other day, 2.5  
29 mg/kg) commenced 48 h post-graft. Tumor volumes measured by calipers (A) or tumor weight (mg) after 12 days  
30 (B). Statistical analysis was assessed using non-linear regression. Expression of *Abca1*, and *Pgp* was assessed by  
31 qPCR analysis (C). Statistical analysis was assessed using one way ANOVA with SNK test, with 10 mice per group  
32 (individual symbols) and shown with median and range.

33 **Figure 4: *LXR $\alpha$*  protein expression is correlated with Pgp expression and is a molecular marker of poor prognosis in  
34 ER-negative breast cancer patients.** Correlation analysis between LXR protein expression and matched mRNA of  
35 *Pgp* in 47 ER-negative breast tumors (relative to HPRT). Line indicates linear regression, correlations calculated  
36 using Pearson correlation. Kaplan Meier survival plots following stratification of the cohort into high and low *LXR $\alpha$*   
37 (B) and *Pgp* (C) expression. Log-rank tests used to calculate significance. (D) Tissue microarray of 148 TNBC tumors  
38 stained for indicated proteins determined by immunohistochemistry and correlated with *Pgp* protein (left) and  
39 disease-free survival (right). (E) scOHC concentrations determined by LC-MS/MS and correlated with *Pgp* protein  
40 (left) and disease-free survival (right). Correlations calculated with Pearson's test and survival differences with log-  
41 rank test and Kaplan-Meier curves.

42 **Figure 5: LXR is decoupled from Pgp in the tumours of patients who survive.** Protein expression (*LXR $\alpha$* ), and mRNA  
43 expression for *ABCA1* and *Pgp* were assessed using one-tailed Mann-Whitney test in the LBRTB cohort  
44 comparing event and no event groups. Pearson correlation analysis between matched *Pgp* mRNA and either  
45 immunoblotting for *LXR $\alpha$*  protein (B), LC-MS/MS for 24OHC (C).

46

47

48



1

2

3

## References

4

- 5 Baek AE, Yu Y-RA, He S, Wardell SE, Chang C-Y, Kwon S, Pillai RV, McDowell HB,  
6 Thompson JW, Dubois LG *et al* (2017) The cholesterol metabolite 27 hydroxycholesterol  
7 facilitates breast cancer metastasis through its actions on immune cells. *Nature*  
8 *Communications* 8: 864
- 9 Bagegni NA, Tao Y, Ademuyiwa FO (2019) Clinical outcomes with neoadjuvant versus  
10 adjuvant chemotherapy for triple negative breast cancer: A report from the National Cancer  
11 Database. *PLoS One* 14: e0222358
- 12 Bauriaud-Mallet M, Vija-Racaru L, Brillouet S, Mallinger A, de Medina P, Rives A, Payre B,  
13 Poirot M, Courbon F, Silvente-Poirot S (2019) The cholesterol-derived metabolite  
14 denderogenin A functionally reprograms breast adenocarcinoma and undifferentiated thyroid  
15 cancer cells. *J Steroid Biochem Mol Biol* 192: 105390
- 16 Brennan SF, Woodside JV, Lunny PM, Cardwell CR, Cantwell MM (2017) Dietary fat and  
17 breast cancer mortality: A systematic review and meta-analysis. *Crit Rev Food Sci Nutr* 57:  
18 1999-2008
- 19 Chlebowski RT, Blackburn GL, Thomson CA, Nixon DW, Shapiro A, Hoy MK, Goodman MT,  
20 Giuliano AE, Karanja N, McAndrew P *et al* (2006) Dietary fat reduction and breast cancer  
21 outcome: interim efficacy results from the Women's Intervention Nutrition Study. *J Natl*  
22 *Cancer Inst* 98: 1767-1776
- 23 Clare K, Hardwick SJ, Carpenter KL, Weeratunge N, Mitchinson MJ (1995) Toxicity of  
24 oxysterols to human monocyte-macrophages. *Atherosclerosis* 118: 67-75
- 25 Dalenc F, Iuliano L, Filleron T, Zerbinati C, Voisin M, Arellano C, Chatelut E, Marquet P,  
26 Samadi M, Roche H *et al* (2017) Circulating oxysterol metabolites as potential new surrogate  
27 markers in patients with hormone receptor-positive breast cancer: Results of the OXYTAM  
28 study. *J Steroid Biochem Mol Biol* 169: 210-218
- 29 Das S, Samant RS, Shevde LA (2013) Nonclassical activation of Hedgehog signaling  
30 enhances multidrug resistance and makes cancer cells refractory to Smoothed-muscle-targeting  
31 Hedgehog inhibition. *J Biol Chem* 288: 11824-11833
- 32 De Cicco P, Catani MV, Gasperi V, Sibilano M, Quaglietta M, Savini I (2019) Nutrition and  
33 Breast Cancer: A Literature Review on Prevention, Treatment and Recurrence. *Nutrients* 11
- 34 Dias IHK, Milic I, Lip GYH, Devitt A, Polidori MC, Griffiths HR (2018) Simvastatin reduces  
35 circulating oxysterol levels in men with hypercholesterolaemia. *Redox Biol* 16: 139-145
- 36 dos Santos CR, Fonseca I, Dias S, de Almeida JCM (2014) Plasma level of LDL-cholesterol  
37 at diagnosis is a predictor factor of breast tumor progression. *Bmc Cancer* 14
- 38 Eccles SA, Aboagye EO, Ali S, Anderson AS, Armes J, Berdichevski F, Blaydes JP, Brennan  
39 K, Brown NJ, Bryant HE *et al* (2013) Critical research gaps and translational priorities for the  
40 successful prevention and treatment of breast cancer. *Breast Cancer Res* 15: R92
- 41 EAli A, Hermann DM (2012) Liver X receptor activation enhances blood-brain barrier integrity  
42 in the ischemic brain and increases the abundance of ATP-binding cassette transporters  
43 ABCB1 and ABCC1 on brain capillary cells. *Brain Pathol* 22: 175-187
- 44 Garrigues A, Escargueil AE, Orlowski S (2002) The multidrug transporter, P-glycoprotein,  
45 actively mediates cholesterol redistribution in the cell membrane. *Proc Natl Acad Sci U S A*  
46 99: 10347-10352
- 47 Guillemot-Legris O, Mutemberezi V, Cani PD, Muccioli GG (2016) Obesity is associated with  
48 changes in oxysterol metabolism and levels in mice liver, hypothalamus, adipose tissue and  
49 plasma. *Sci Rep* 6: 19694
- 50 Hutchinson SA, Lianto P, Roberg-Larsen H, Battaglia S, Hughes TA, Thorne JL (2019) ER-  
51 Negative Breast Cancer Is Highly Responsive to Cholesterol Metabolite Signalling. *Nutrients*  
52 11
- 53 Janowski BA, Willy PJ, Devi TR, Falck JR, Mangelsdorf DJ (1996) An oxysterol signalling  
54 pathway mediated by the nuclear receptor LXR alpha. *Nature* 383: 728-731
- 55 Jiang L, Zhao X, Xu J, Li C, Yu Y, Wang W, Zhu L (2019) The Protective Effect of Dietary  
56 Phytosterols on Cancer Risk: A Systematic Meta-Analysis. *Journal of Oncology* 2019: 11



- 1 Kim B, Fatayer H, Hanby AM, Horgan K, Perry SL, Valleley EM, Verghese ET, Williams BJ,
- 2 Thorne JL, Hughes TA (2013) Neoadjuvant chemotherapy induces expression levels of
- 3 breast cancer resistance protein that predict disease-free survival in breast cancer. *PLoS One*
- 4 8: e62766
- 5 Kim B, Stephen SL, Hanby AM, Horgan K, Perry SL, Richardson J, Roundhill EA, Valleley
- 6 EM, Verghese ET, Williams BJ *et al* (2015) Chemotherapy induces Notch1-dependent MRP1
- 7 up-regulation, inhibition of which sensitizes breast cancer cells to chemotherapy. *BMC*
- 8 *Cancer* 15: 634
- 9 Liedtke C, Mazouni C, Hess KR, Andre F, Tordai A, Mejia JA, Symmans WF, Gonzalez-
- 10 Angulo AM, Hennessey B, Green M *et al* (2008) Response to neoadjuvant therapy and long-
- 11 term survival in patients with triple-negative breast cancer. *J Clin Oncol* 26: 1275-1281
- 12 Liu B, Yi Z, Guan X, Zeng Y-X, Ma F (2017a) The relationship between statins and breast
- 13 cancer prognosis varies by statin type and exposure time: a meta-analysis. *Breast Cancer*
- 14 *Research and Treatment* 164: 1-11
- 15 Liu B, Yi Z, Guan X, Zeng YX, Ma F (2017b) The relationship between statins and breast
- 16 cancer prognosis varies by statin type and exposure time: a meta-analysis. *Breast Cancer*
- 17 *Res Treat* 164: 1-11
- 18 Nelson ER, Wardell SE, Jasper JS, Park S, Suchindran S, Howe MK, Carver NJ, Pillai RV,
- 19 Sullivan PM, Sondhi V *et al* (2013) 27-Hydroxycholesterol links hypercholesterolemia and
- 20 breast cancer pathophysiology. *Science* 342: 1094-1098
- 21 Nguyen VT, Barozzi I, Faronato M, Lombardo Y, Steel JH, Patel N, Darbre P, Castellano L,
- 22 Gyorffy B, Woodley L *et al* (2015) Differential epigenetic reprogramming in response to
- 23 specific endocrine therapies promotes cholesterol biosynthesis and cellular invasion. *Nature*
- 24 *communications* 6: 10044
- 25 Poirot M, Silvente-Poirot S (2018) The tumor-suppressor cholesterol metabolite, dendrogenin
- 26 A, is a new class of LXR modulator activating lethal autophagy in cancers. *Biochem*
- 27 *Pharmacol* 153: 75-81
- 28 Saint-Pol J, Candela P, Boucau MC, Fenart L, Gosselet F (2013) Oxysterols decrease apical-
- 29 to-basolateral transport of Ass peptides via an ABCB1-mediated process in an in vitro Blood-
- 30 brain barrier model constituted of bovine brain capillary endothelial cells. *Brain research* 1517:
- 31 1-15
- 32 Shahoei SH, Kim YC, Cler SJ, Ma L, Anakk S, Kemper JK, Nelson ER (2019) Small
- 33 Heterodimer Partner Regulates Dichotomous T Cell Expansion by Macrophages.
- 34 *Endocrinology* 160: 1573-1589
- 35 Sozen E, Yazgan B, Sahin A, Ince U, Ozer NK (2018) High Cholesterol Diet-Induced
- 36 Changes in Oxysterol and Scavenger Receptor Levels in Heart Tissue. *Oxid Med Cell Longev*
- 37 2018: 8520746
- 38 Tabas I (2002) Consequences of cellular cholesterol accumulation: basic concepts and
- 39 physiological implications. *J Clin Invest* 110: 905-911
- 40 Tavazoie MF, Pollack I, Tanqueco R, Ostendorf BN, Reis BS, Gonsalves FC, Kurth I, Andreu-
- 41 Agullo C, Derbyshire ML, Posada J *et al* (2018) LXR/ApoE Activation Restricts Innate
- 42 Immune Suppression in Cancer. *Cell* 172: 825-840 e818
- 43 Thorne JL, Battaglia S, Baxter DE, Hayes JL, Hutchinson SA, Jana S, Millican-Slater RA,
- 44 Smith L, Teske MC, Wastall LM *et al* (2018) MiR-19b non-canonical binding is directed by
- 45 HuR and confers chemosensitivity through regulation of P-glycoprotein in breast cancer.
- 46 *Biochim Biophys Acta Gene Regul Mech* 1861: 996-1006
- 47 Thorne JL, Moore JB, Corfe BM (2020) Nutrition and cancer: evidence gaps and opportunities
- 48 for improving knowledge. *Proc Nutr Soc*: 1-6
- 49 Toledo E, Salas-Salvado J, Donat-Vargas C, Buil-Cosiales P, Estruch R, Ros E, Corella D,
- 50 Fito M, Hu FB, Aros F *et al* (2015) Mediterranean Diet and Invasive Breast Cancer Risk
- 51 Among Women at High Cardiovascular Risk in the PREDIMED Trial: A Randomized Clinical
- 52 Trial. *JAMA Intern Med* 175: 1752-1760
- 53 Wouters E, de Wit NM, Vanmol J, van der Pol SMA, van Het Hof B, Sommer D, Loix M,
- 54 Geerts D, Gustafsson JA, Steffensen KR *et al* (2019) Liver X Receptor Alpha Is Important in
- 55 Maintaining Blood-Brain Barrier Function. *Front Immunol* 10: 1811-1811
- 56 Wu Q, Ishikawa T, Sirianni R, Tang H, McDonald JG, Yuhanna IS, Thompson B, Girard L,
- 57 Mineo C, Brekken RA *et al* (2013) 27-Hydroxycholesterol promotes cell-autonomous, ER-
- 58 positive breast cancer growth. *Cell Rep* 5: 637-645
- 59 Xia LY, Hu QL, Zhang J, Xu WY, Li XS (2020) Survival outcomes of neoadjuvant versus
- 60 adjuvant chemotherapy in triple-negative breast cancer: a meta-analysis of 36,480 cases.
- 61 *World J Surg Oncol* 18: 129

1 Yang M, Yu L, Guo R, Dong A, Lin C, Zhang J (2018) A Modular Coassembly Approach to  
2 All-In-One Multifunctional Nanoplatform for Synergistic Codelivery of Doxorubicin and  
3 Curcumin. *Nanomaterials (Basel)* 8

4

5

Figure 1

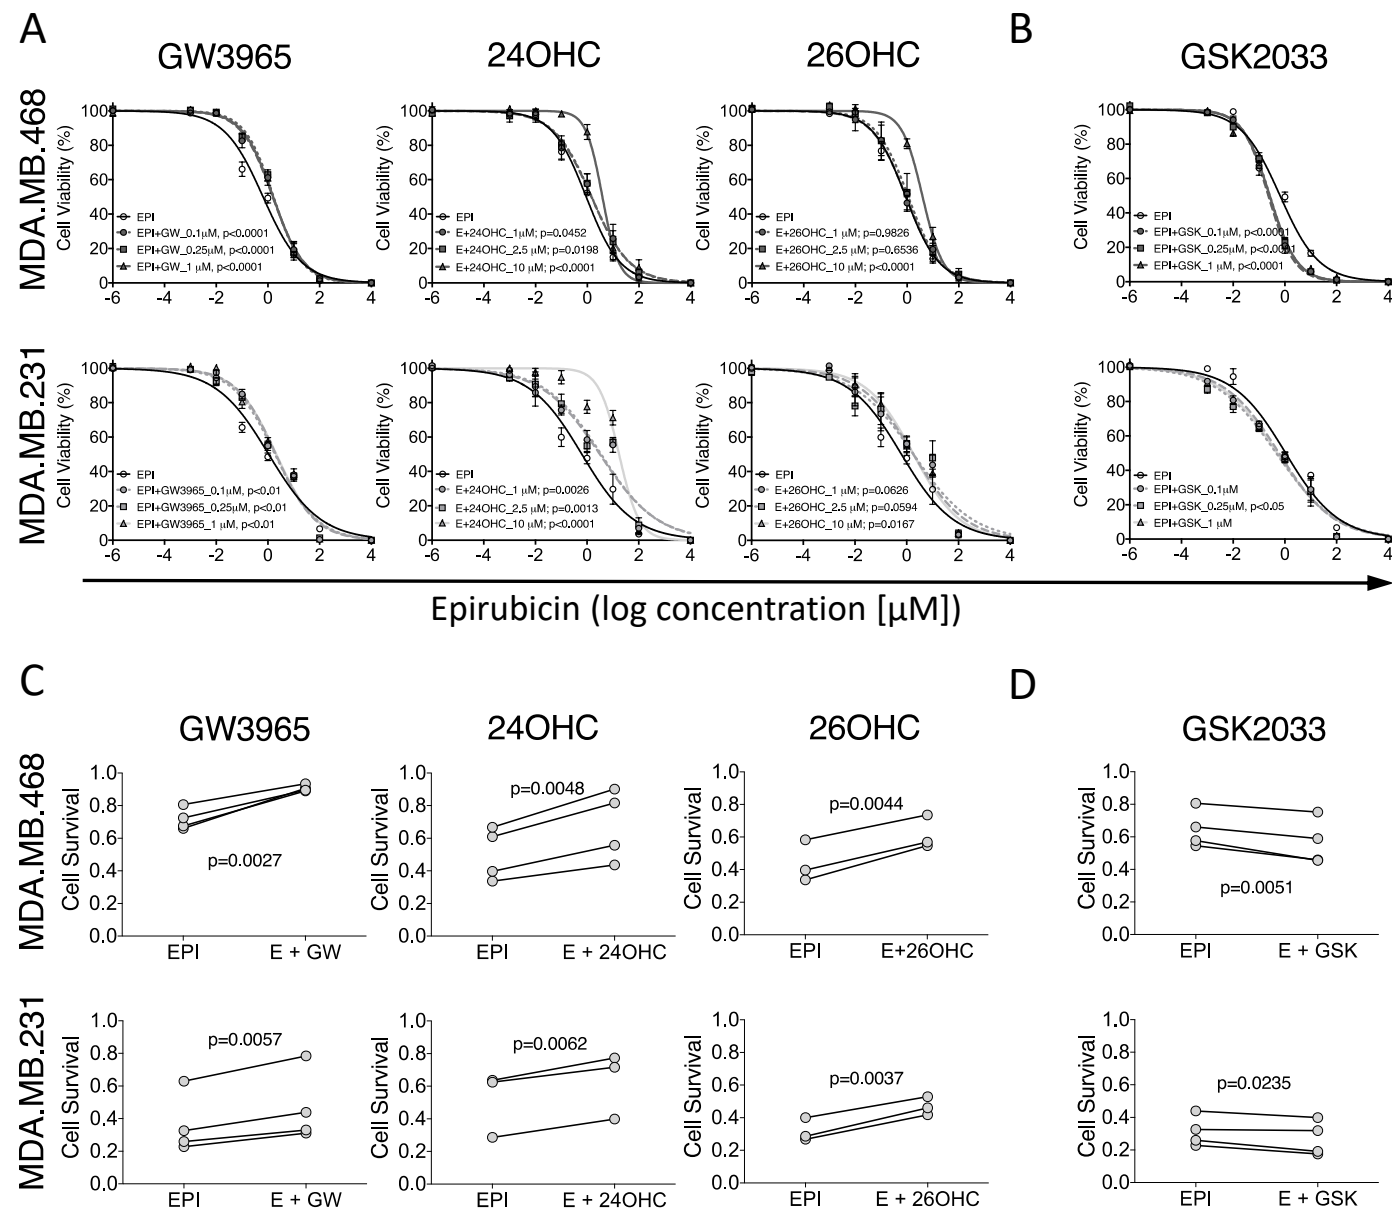

Figure 2

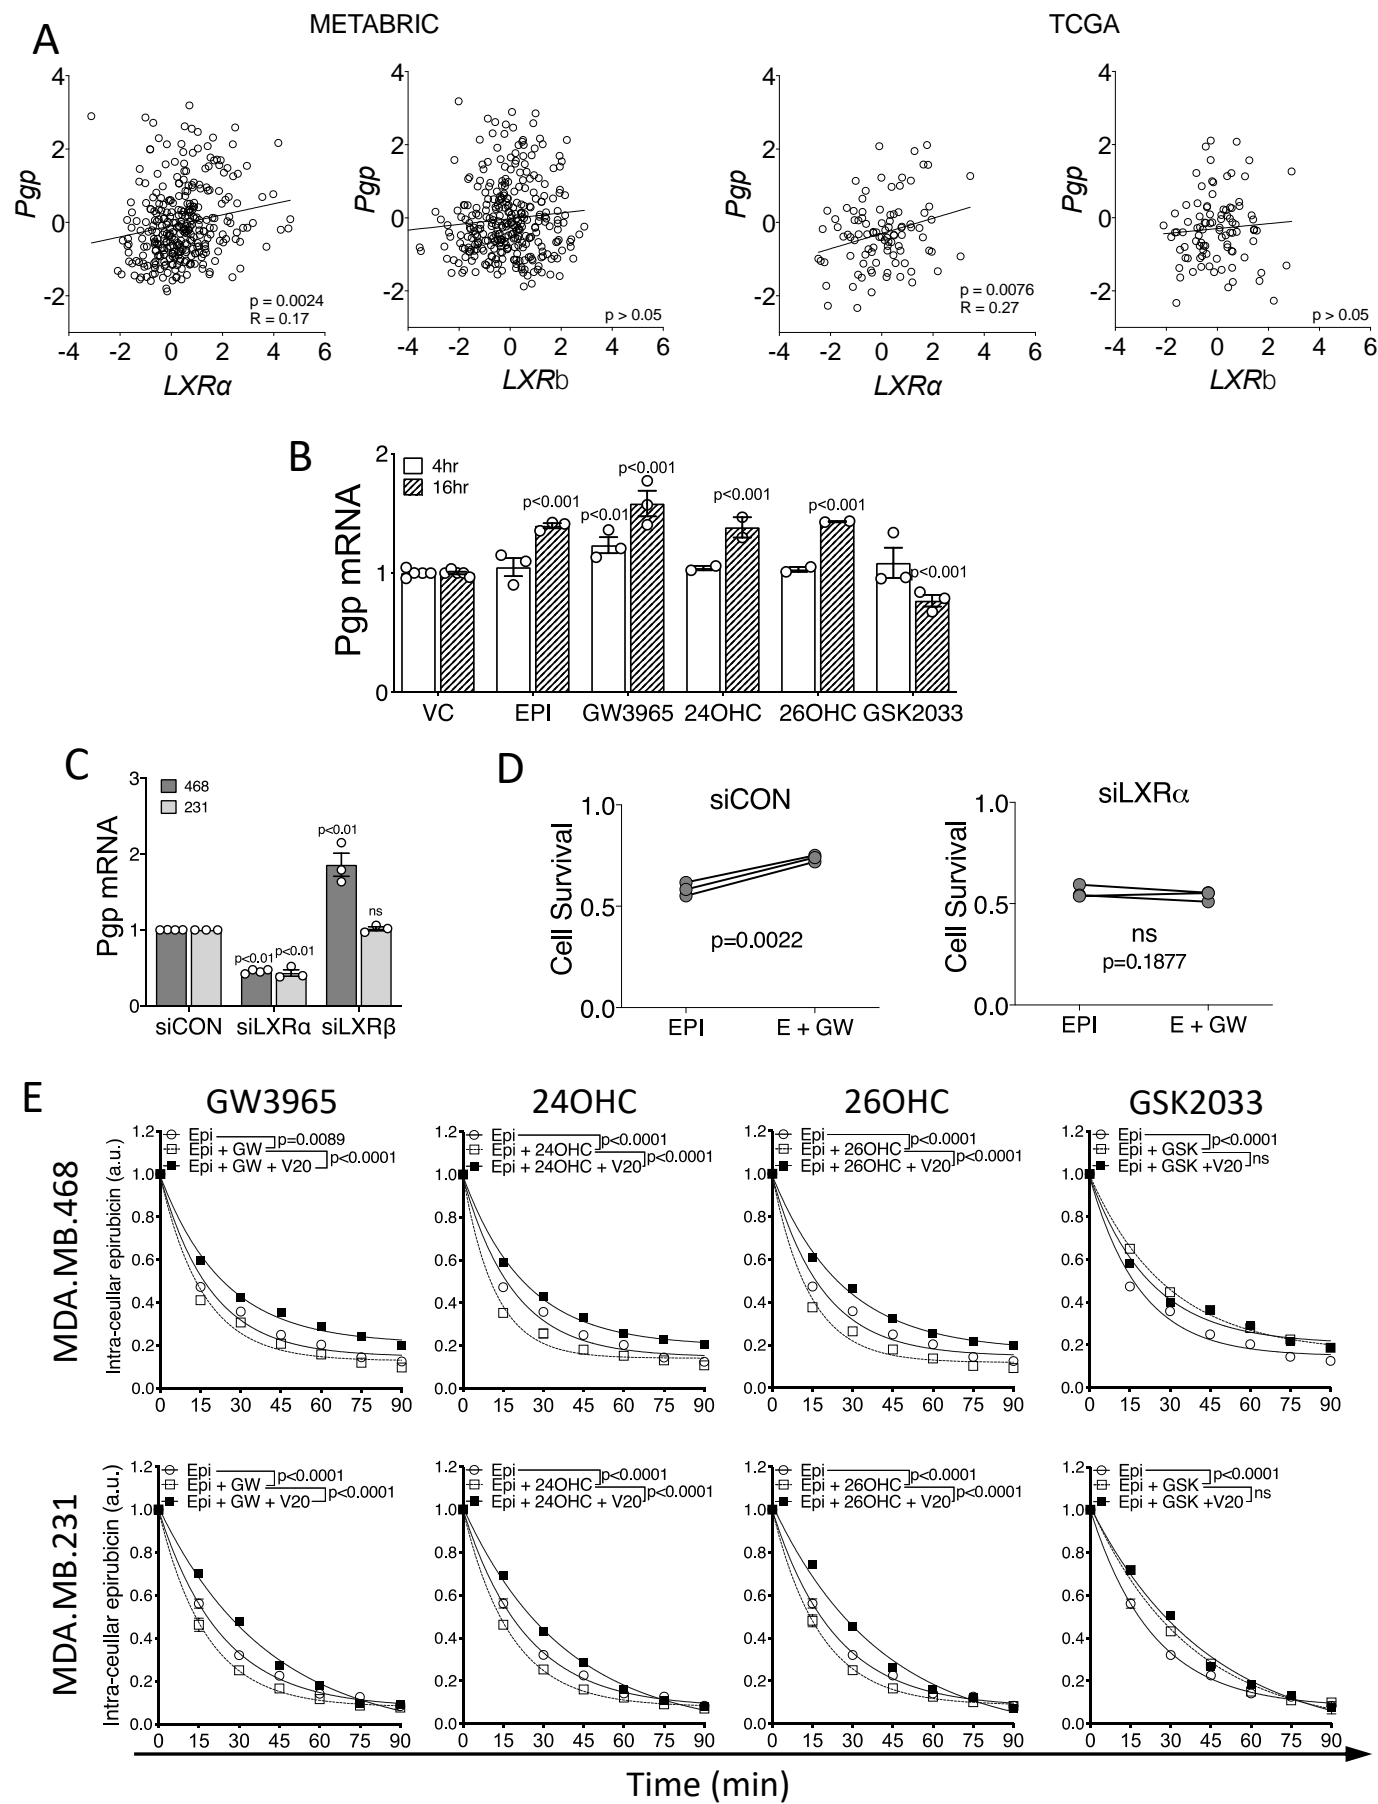

Figure 3

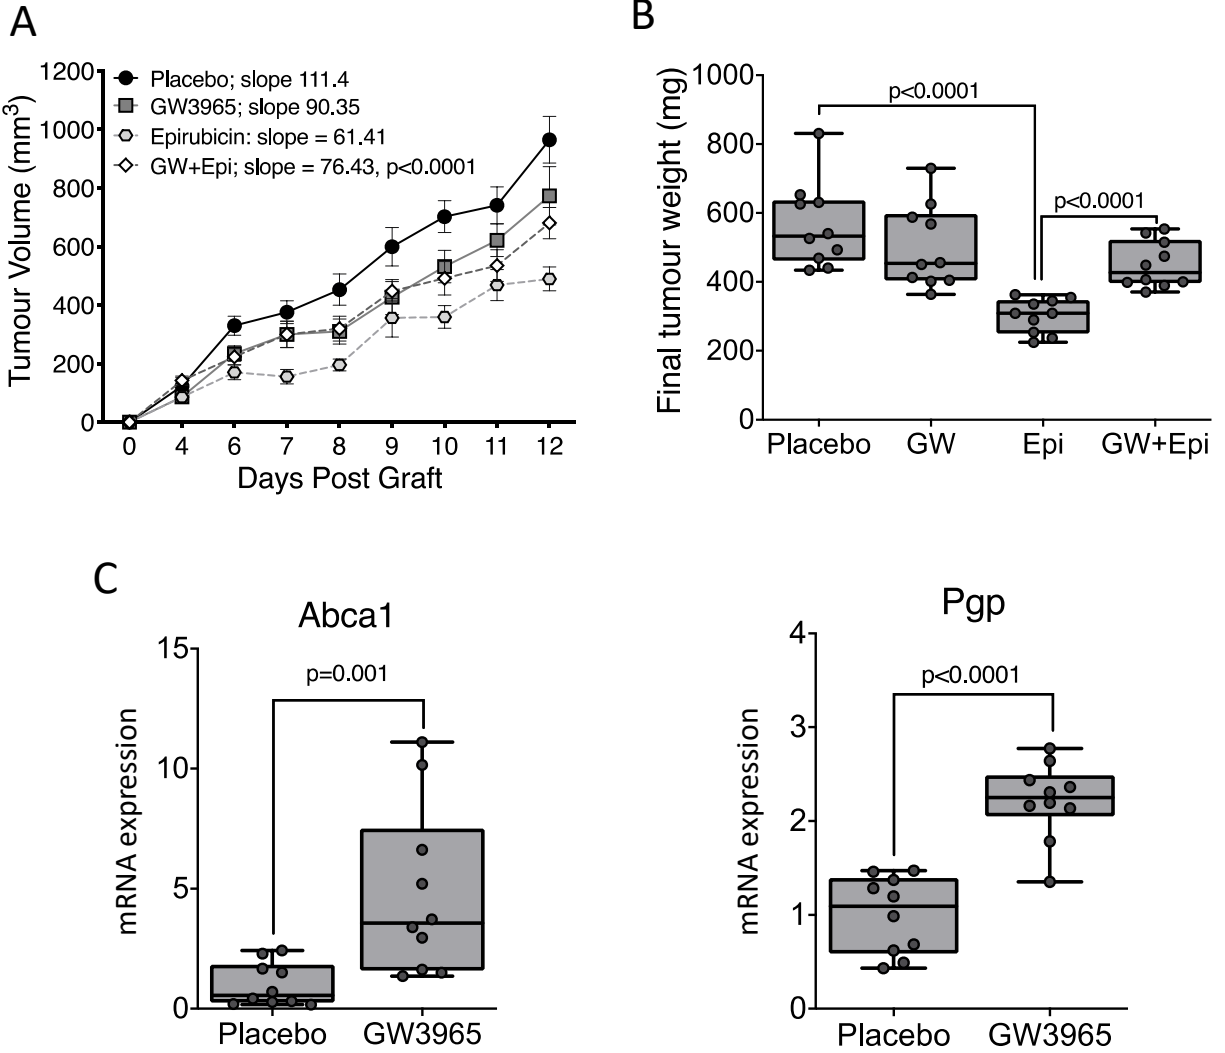

Figure 4

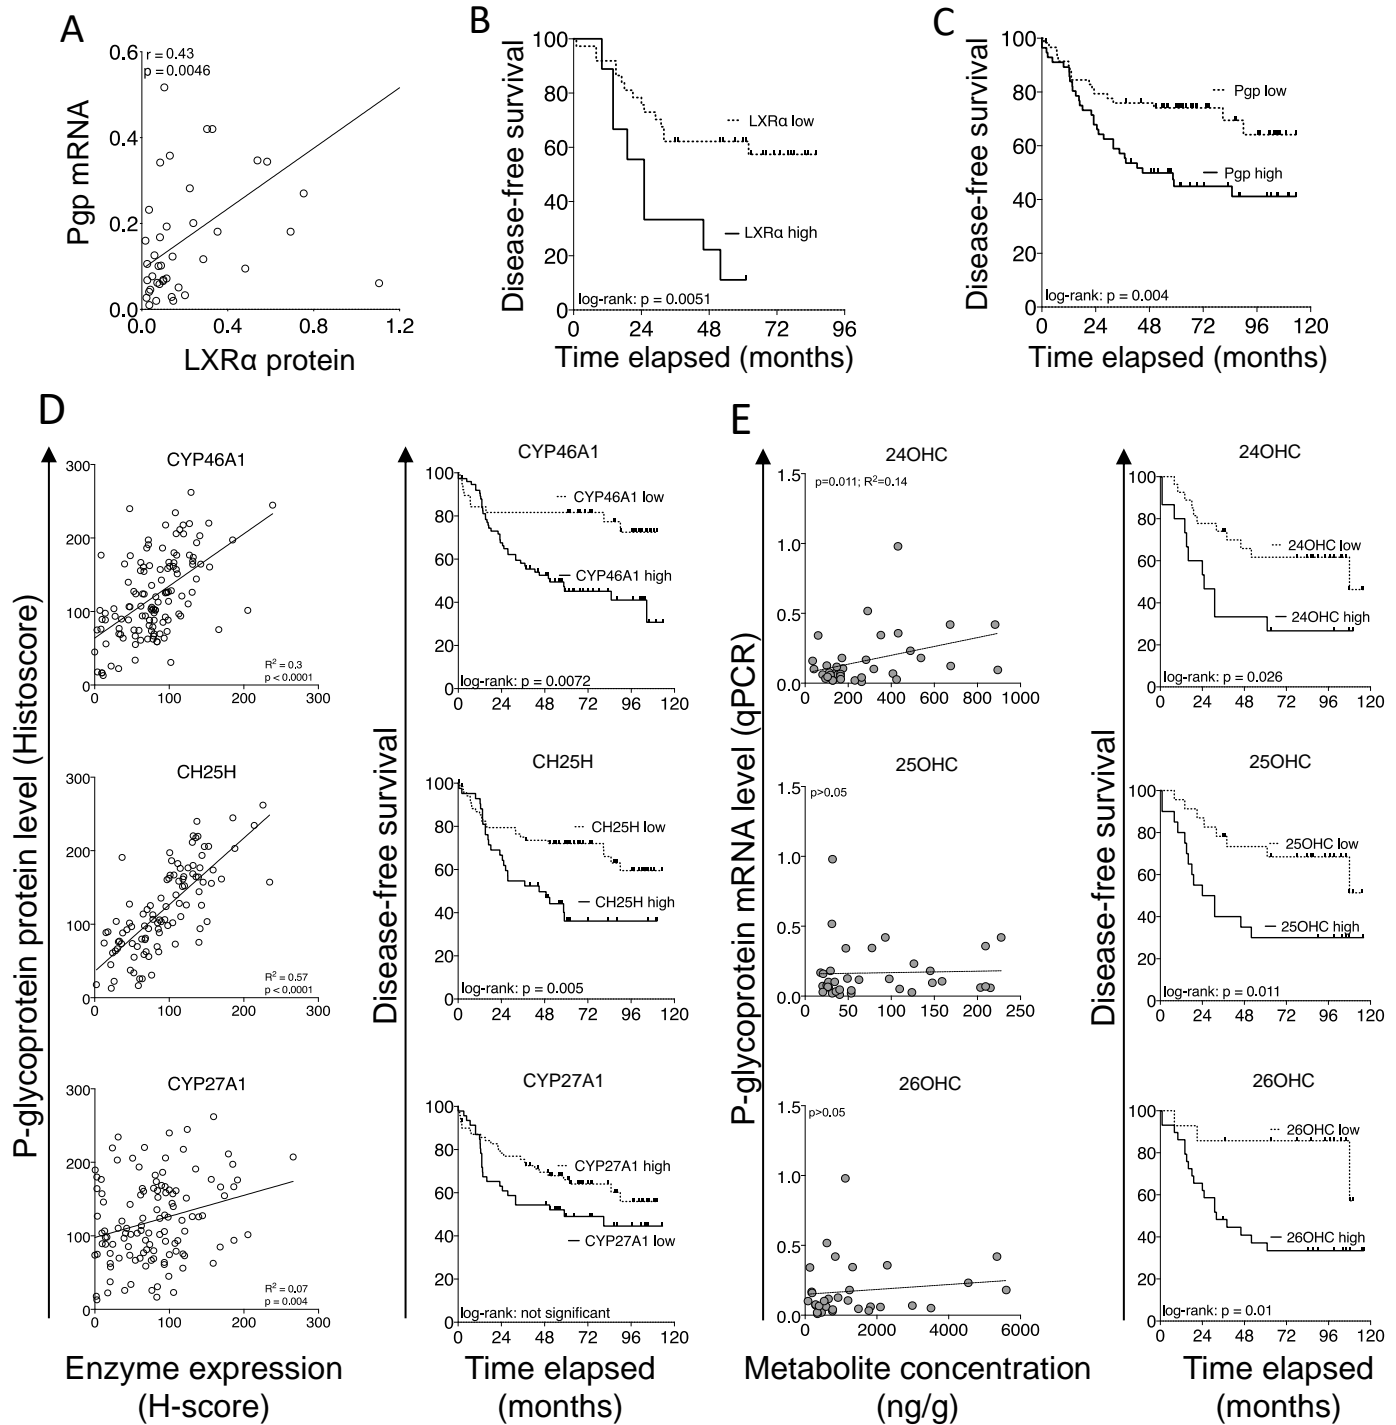

Figure 5

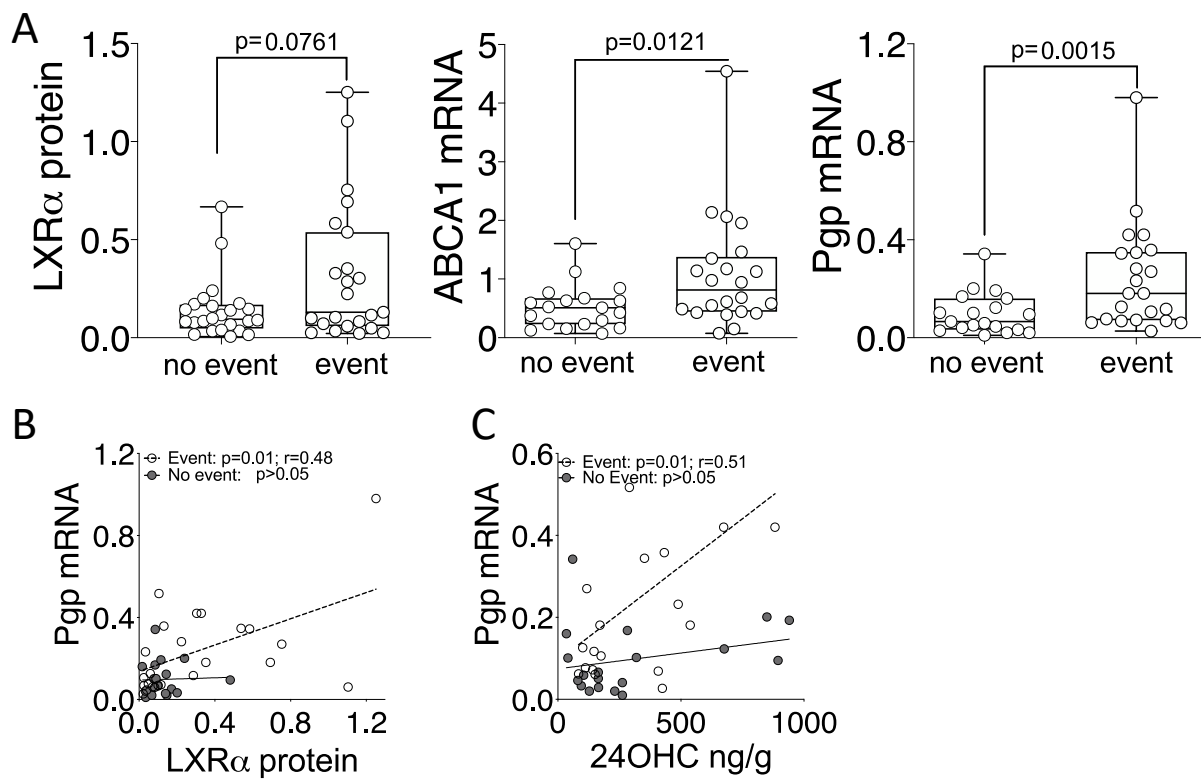

Source: https://www.biorxiv.org/content/biorxiv/early/2020/08/07/2020.08.04.235697.full.pdf
